# Supplementary material for: Reversible on–off switching of a single-chain magnet via single-crystal-to-single-crystal transition and light-induced metal-to-metal electron transfer
Source: Royal Society of Chemistry journal article supplement (doi:10.1039/d4qi01691b), 2024-01-01
Supplement: d4qi01691b1.pdf [file d4qi01691b1.pdf]

## Supporting Information

### **Reversible on–off switching of a single-chain magnet via single-crystal-to-single-crystal transition- and light-induced metal-to-metal electron transfer**

Meng-Jia Shang,<sup>a</sup> Han-Han Lu,<sup>a</sup> Qiang Liu,<sup>b</sup> Ren-He Zhou,<sup>a</sup> Hui-Ying Sun<sup>a</sup>, Zhen Shao,<sup>a</sup> Yin-Shan Meng<sup>\*a</sup> and Tao Liu<sup>\*a</sup>

<sup>a</sup> *State Key Laboratory of Fine Chemicals, Frontier Science Center for Smart Materials, School of Chemical Engineering, Dalian University of Technology, 2 Linggong Road, Dalian 116024, China.*

<sup>b</sup> *Instrumental Analysis Center, Dalian University of Technology, 2 Linggong Road, Dalian 116024, China*

\*Corresponding Author(s): mengys@dlut.edu.cn (Y.-S. Meng); liutao@dlut.edu.cn (T. Liu)

## Contents

|                                                                                                                                                                                            |    |
|--------------------------------------------------------------------------------------------------------------------------------------------------------------------------------------------|----|
| <b>Table S1.</b> Crystallographic Data for <b>1·solv</b> , <b>1·desolv</b> and <b>1·resolv</b> at 298 K. ....                                                                              | 3  |
| <b>Table S2.</b> Crystallographic Data for <b>1·solv</b> at 60 K before and after 808- and 532-nm light irradiations. ....                                                                 | 4  |
| <b>Table S3.</b> Selected bond distances (Å) and angles (°) for <b>1·solv</b> at 298 K. ....                                                                                               | 5  |
| <b>Table S4.</b> Selected bond distances (Å) and angles (°) for <b>1·desolv</b> at 298 K. ....                                                                                             | 6  |
| <b>Table S5.</b> Selected bond distances (Å) and angles (°) for <b>1·resolv</b> at 298 K. ....                                                                                             | 7  |
| <b>Table S6.</b> Selected bond distances (Å) and angles (°) for <b>1·solv</b> at 60 K. ....                                                                                                | 8  |
| <b>Table S7.</b> Selected bond distances (Å) and angles (°) for <b>1·solv</b> after 808 nm irradiation at 60 K. ...                                                                        | 9  |
| <b>Table S8.</b> Selected bond distances (Å) and angles (°) for <b>1·solv</b> after 532 nm irradiation at 60 K. .                                                                          | 10 |
| <b>Table S9.</b> Continuous Shape Measure (CShM) analyses of geometries for compounds <b>1·solv</b> and <b>1·desolv</b> at 298 K by SHAPE 2.0 Software. ....                               | 11 |
| <b>Table S10.</b> Hydrogen bond distances (Å) and angles (°) for <b>1·solv</b> at 298 K. ....                                                                                              | 11 |
| <b>Table S11.</b> <sup>57</sup> Fe Mössbauer parameters for <b>1·solv</b> at 200 K. ....                                                                                                   | 12 |
| <b>Table S12.</b> Temperature-dependent <sup>57</sup> Fe Mössbauer parameters for <b>1·desolv</b> . ....                                                                                   | 12 |
| <b>Fig. S1.</b> TGA analyses of <b>1·solv</b> in the nitrogen atmosphere at 10 K min <sup>-1</sup> ....                                                                                    | 13 |
| <b>Fig. S2.</b> Schematic structures of the {Fe <sub>2</sub> Co}-based double zig-zag chains in <b>1·desolv</b> at 298 K. ...                                                              | 13 |
| <b>Fig. S3.</b> The overlapped molecular structures of <b>1·solv</b> and <b>1·desolv</b> at 298 K. ....                                                                                    | 14 |
| <b>Fig. S4.</b> Crystal structure of <b>1·resolv</b> at 298 K. ....                                                                                                                        | 14 |
| <b>Fig. S5.</b> The simulated and experimental powder X-ray diffraction patterns of <b>1·solv</b> at 298 K. ....                                                                           | 15 |
| <b>Fig. S6.</b> Plots of $\chi T$ vs $T$ for <b>1·solv</b> between 2 and 300 K. ....                                                                                                       | 15 |
| <b>Fig. S7</b> Temperature dependent <sup>57</sup> Fe Mössbauer spectra of <b>1·solv</b> at 200 K. ....                                                                                    | 16 |
| <b>Fig. S8.</b> Infrared spectra for compounds <b>1·solv</b> and <b>1·desolv</b> at 298 K. ....                                                                                            | 16 |
| <b>Fig. S9.</b> Solid state UV-vis-NIR spectra for <b>1·solv</b> and <b>1·desolv</b> at 298 K. ....                                                                                        | 17 |
| <b>Fig. S10.</b> Plots of $\chi T$ vs time for <b>1·solv</b> irradiated under 808 nm at 10 K. ....                                                                                         | 17 |
| <b>Fig. S11.</b> Temperature-dependent susceptibilities of <b>1·solv</b> before and after light irradiation under an 1000 Oe DC field. ....                                                | 18 |
| <b>Fig. S12.</b> Arrhenius plots for the magnetic relaxation process of <b>1·solv</b> after 808 nm light irradiation based on the peak values of $\chi''$ . ....                           | 18 |
| <b>Fig. S13.</b> Hydrogen bonds formed between lattice solvent molecules and terminal cyanide nitrogen atoms for <b>1·solv</b> . ....                                                      | 19 |
| <b>Fig. S14.</b> Variable temperature solid state IR spectra of <b>1·desolv</b> in cooling mode. ....                                                                                      | 19 |
| <b>Fig. S15.</b> Variable temperature solid state UV-vis-NIR absorption spectra of <b>1·desolv</b> in cooling mode. ....                                                                   | 20 |
| <b>Fig. S16.</b> Temperature dependence of in-phase signals ( $\chi'$ ) (a) and out-of-phase signals ( $\chi''$ ) (b) for <b>1·desolv</b> under a 5 Oe AC field and 2000 Oe DC field. .... | 21 |
| <b>Fig. S17.</b> Plots of $\chi T$ vs. $T$ for <b>1·resolv</b> between 2 and 300 K. ....                                                                                                   | 22 |

**Table S1.** Crystallographic Data for **1·solv**, **1·desolv** and **1·resolv** at 298 K.

|                                                               | <b>1·solv</b>                                                                                                    | <b>1·desolv</b>                                                                                 | <b>1·resolv</b>                                                                                                |
|---------------------------------------------------------------|------------------------------------------------------------------------------------------------------------------|-------------------------------------------------------------------------------------------------|----------------------------------------------------------------------------------------------------------------|
| Formula                                                       | C <sub>50</sub> H <sub>47</sub> B <sub>2</sub> CoFe <sub>2</sub> I <sub>2</sub> N <sub>26</sub> O <sub>2.5</sub> | C <sub>48</sub> H <sub>38</sub> B <sub>2</sub> CoFe <sub>2</sub> I <sub>2</sub> N <sub>26</sub> | C <sub>49</sub> H <sub>44</sub> B <sub>2</sub> CoFe <sub>2</sub> I <sub>2</sub> N <sub>26</sub> O <sub>2</sub> |
| Fw                                                            | 1498.19                                                                                                          | 1425.09                                                                                         | 1475.15                                                                                                        |
| Crystal system                                                | Triclinic                                                                                                        | Triclinic                                                                                       | Triclinic                                                                                                      |
| Space group                                                   | <i>P</i> $\bar{1}$                                                                                               | <i>P</i> $\bar{1}$                                                                              | <i>P</i> $\bar{1}$                                                                                             |
| <i>a</i> , Å                                                  | 13.3825(4)                                                                                                       | 13.401(4)                                                                                       | 13.445(3)                                                                                                      |
| <i>b</i> , Å                                                  | 13.8767(4)                                                                                                       | 13.567(5)                                                                                       | 13.530(3)                                                                                                      |
| <i>c</i> , Å                                                  | 17.8617(5)                                                                                                       | 18.266(6)                                                                                       | 17.944(4)                                                                                                      |
| $\alpha$ , °                                                  | 79.1420(10)                                                                                                      | 70.833(9)                                                                                       | 78.456(6)                                                                                                      |
| $\beta$ , °                                                   | 70.1710(10)                                                                                                      | 78.105(9)                                                                                       | 70.117(6)                                                                                                      |
| $\gamma$ , °                                                  | 77.3290(10)                                                                                                      | 75.770(9)                                                                                       | 76.611(6)                                                                                                      |
| <i>V</i> , Å <sup>3</sup>                                     | 3020.78(15)                                                                                                      | 3011.8(17)                                                                                      | 2959.9(10)                                                                                                     |
| <i>Z</i>                                                      | 1                                                                                                                | 2                                                                                               | 2                                                                                                              |
| $\rho_{\text{calc}}$ , g/cm <sup>3</sup>                      | 1.647                                                                                                            | 1.571                                                                                           | 1.655                                                                                                          |
| $\mu$ /mm <sup>-1</sup>                                       | 1.831                                                                                                            | 1.829                                                                                           | 1.867                                                                                                          |
| <i>F</i> (000)                                                | 1488.0                                                                                                           | 1406.0                                                                                          | 1462.0                                                                                                         |
| Reflections collected                                         | 65667                                                                                                            | 45629                                                                                           | 57552                                                                                                          |
| Unique reflections ( <i>R</i> <sub>int</sub> )                | 0.0353                                                                                                           | 0.1805                                                                                          | 0.0791                                                                                                         |
| Goodness-of-fit on <i>F</i> <sup>2</sup>                      | 1.028                                                                                                            | 1.024                                                                                           | 1.061                                                                                                          |
| <i>R</i> <sub>1</sub> , [ <i>I</i> >2 $\sigma$ ( <i>I</i> )]  | 0.0428                                                                                                           | 0.0977                                                                                          | 0.0633                                                                                                         |
| <i>wR</i> <sub>2</sub> , [ <i>I</i> >2 $\sigma$ ( <i>I</i> )] | 0.0963                                                                                                           | 0.2152                                                                                          | 0.1720                                                                                                         |

$$R_1 = \Sigma (|F_o| - |F_c|) / \Sigma |F_o|, \quad wR_2 = \{\Sigma [w(F_o^2 - F_c^2)^2] / \Sigma [w(F_o^2)^2]\}^{1/2}$$

**Table S2.** Crystallographic Data for **1·solv** at 60 K before and after 808- and 532-nm light irradiations.

|                                                       | <b>1·solv</b>                                                                                                    | <b>1·solv</b> <sup>808 nm</sup>                                                                                  | <b>1·solv</b> <sup>532 nm</sup>                                                                                  |
|-------------------------------------------------------|------------------------------------------------------------------------------------------------------------------|------------------------------------------------------------------------------------------------------------------|------------------------------------------------------------------------------------------------------------------|
| Formula                                               | C <sub>50</sub> H <sub>47</sub> B <sub>2</sub> CoFe <sub>2</sub> I <sub>2</sub> N <sub>26</sub> O <sub>2.5</sub> | C <sub>50</sub> H <sub>47</sub> B <sub>2</sub> CoFe <sub>2</sub> I <sub>2</sub> N <sub>26</sub> O <sub>2.5</sub> | C <sub>50</sub> H <sub>47</sub> B <sub>2</sub> CoFe <sub>2</sub> I <sub>2</sub> N <sub>26</sub> O <sub>2.5</sub> |
| <i>F</i> w                                            | 1498.19                                                                                                          | 1498.19                                                                                                          | 1498.19                                                                                                          |
| Crystal system                                        | Triclinic                                                                                                        | Triclinic                                                                                                        | Triclinic                                                                                                        |
| Space group                                           | <i>P</i> $\bar{1}$                                                                                               | <i>P</i> $\bar{1}$                                                                                               | <i>P</i> $\bar{1}$                                                                                               |
| <i>a</i> , Å                                          | 13.321(1)                                                                                                        | 13.365(2)                                                                                                        | 13.343(1)                                                                                                        |
| <i>b</i> , Å                                          | 13.574(0)                                                                                                        | 13.654(2)                                                                                                        | 13.538(1)                                                                                                        |
| <i>c</i> , Å                                          | 17.762(5)                                                                                                        | 18.330(3)                                                                                                        | 17.779(4)                                                                                                        |
| $\alpha$ , °                                          | 78.044(3)                                                                                                        | 78.405(4)                                                                                                        | 78.010(2)                                                                                                        |
| $\beta$ , °                                           | 70.353(4)                                                                                                        | 70.864(5)                                                                                                        | 70.254(2)                                                                                                        |
| $\gamma$ , °                                          | 76.573(3)                                                                                                        | 75.394(5)                                                                                                        | 76.594(2)                                                                                                        |
| <i>V</i> , Å <sup>3</sup>                             | 2912.8(5)                                                                                                        | 3032.1(8)                                                                                                        | 2911.0(4)                                                                                                        |
| <i>Z</i>                                              | 1                                                                                                                | 1                                                                                                                | 1                                                                                                                |
| $\rho_{\text{calc}}$ , g/cm <sup>3</sup>              | 1.708                                                                                                            | 1.641                                                                                                            | 1.709                                                                                                            |
| $\mu$ /mm <sup>-1</sup>                               | 1.899                                                                                                            | 1.824                                                                                                            | 1.900                                                                                                            |
| <i>F</i> (000)                                        | 1488.0                                                                                                           | 1488.0                                                                                                           | 1488.0                                                                                                           |
| Reflections collected                                 | 17349                                                                                                            | 44099                                                                                                            | 43980                                                                                                            |
| Unique reflections ( <i>R</i> <sub>int</sub> )        | 0.0853                                                                                                           | 0.1066                                                                                                           | 0.1270                                                                                                           |
| Goodness-of-fit on <i>F</i> <sup>2</sup>              | 1.021                                                                                                            | 1.013                                                                                                            | 1.021                                                                                                            |
| <i>R</i> <sub>1</sub> , [ <i>I</i> > 2σ( <i>I</i> )]  | 0.0676                                                                                                           | 0.0777                                                                                                           | 0.0611                                                                                                           |
| <i>wR</i> <sub>2</sub> , [ <i>I</i> > 2σ( <i>I</i> )] | 0.1603                                                                                                           | 0.1882                                                                                                           | 0.1024                                                                                                           |

$$R_1 = \Sigma (|F_o| - |F_c|) / \Sigma |F_o|, \quad wR_2 = \{ \Sigma [w(F_o^2 - F_c^2)^2] / \Sigma [w(F_o^2)^2] \}^{1/2}$$

**Table S3.** Selected bond distances (Å) and angles (°) for **1·solv** at 298 K.

| Bond length (Å) |          | Bond angle (°)      |           |
|-----------------|----------|---------------------|-----------|
| Co(1)–N(3)      | 1.882(3) | N(5)#1–Co(1)–N(7)   | 89.92(11) |
| Co(1)–N(3)#1    | 1.882(3) | N(5)–Co(1)–N(7)#1   | 89.92(11) |
| Co(1)–N(5)      | 1.876(3) | N(5)–Co(1)–N(7)     | 90.08(11) |
| Co(1)–N(5)#1    | 1.876(3) | N(5)#1–Co(1)–N(7)#1 | 90.08(11) |
| Co(1)–N(7)      | 1.940(3) | N(5)–Co(1)–N(3)     | 89.59(11) |
| Co(1)–N(7)#1    | 1.940(3) | N(5)–Co(1)–N(3)#1   | 90.41(11) |
| Co(2)–N(2)      | 1.891(3) | N(5)#1–Co(1)–N(3)#1 | 89.59(11) |
| Co(2)–N(2)#2    | 1.891(3) | N(5)#1–Co(1)–N(3)   | 90.41(11) |
| Co(2)–N(6)      | 1.887(3) | N(3)–Co(1)–N(7)     | 91.70(11) |
| Co(2)–N(6)#2    | 1.887(3) | N(3)–Co(1)–N(7)#1   | 88.30(11) |
| Co(2)–N(8)      | 1.947(3) | N(3)#1–Co(1)–N(7)#1 | 91.70(11) |
| Co(2)–N(8)#2    | 1.947(3) | N(3)#1–Co(1)–N(7)   | 88.30(11) |
|                 |          |                     |           |
| Fe(1)–C(1)      | 1.917(4) | N(6)#2–Co(2)–N(8)   | 90.13(11) |
| Fe(1)–C(2)      | 1.916(4) | N(6)–Co(2)–N(8)#2   | 90.13(11) |
| Fe(1)–C(3)      | 1.912(3) | N(6)–Co(2)–N(8)     | 89.87(11) |
| Fe(1)–N(14)     | 1.969(3) | N(6)#2–Co(2)–N(8)#2 | 89.87(11) |
| Fe(1)–N(16)     | 1.956(3) | N(6)–Co(2)–N(2)     | 89.36(11) |
| Fe(1)–N(18)     | 1.969(3) | N(6)#2–Co(2)–N(2)#2 | 89.36(11) |
| Fe(2)–C(4)      | 1.912(4) | N(6)#2–Co(2)–N(2)   | 90.64(11) |
| Fe(2)–C(5)      | 1.861(3) | N(6)–Co(2)–N(2)#2   | 90.64(11) |
| Fe(2)–C(6)      | 1.866(3) | N(2)–Co(2)–N(8)#2   | 89.51(11) |
| Fe(2)–N(22)     | 2.003(2) | N(2)#2–Co(2)–N(8)#2 | 90.49(11) |
| Fe(2)–C(24)     | 2.014(3) | N(2)–Co(2)–N(8)     | 90.49(11) |
| Fe(2)–N(26)     | 1.991(2) | N(2)#2–Co(2)–N(8)   | 89.51(11) |

#1 1-X, 1-Y, 1-Z; #2 -X, 1-Y, 1-Z

**Table S4.** Selected bond distances (Å) and angles (°) for **1·desolv** at 298 K.

| Bond length (Å) |           | Bond angle (°)      |         |
|-----------------|-----------|---------------------|---------|
| Co(1)–N(3)      | 2.076(10) | N(5)#1–Co(1)–N(7)   | 92.1(3) |
| Co(1)–N(3)#1    | 2.076(10) | N(5)–Co(1)–N(7)     | 87.9(4) |
| Co(1)–N(5)      | 2.072(9)  | N(5)#1–Co(1)–N(7)#1 | 87.9(4) |
| Co(1)–N(5)#1    | 2.072(9)  | N(5)–Co(1)–N(7)#1   | 92.1(3) |
| Co(1)–N(7)      | 2.127(9)  | N(5)–Co(1)–N(3)#1   | 87.9(4) |
| Co(1)–N(7)#1    | 2.127(9)  | N(5)–Co(1)–N(3)     | 92.1(4) |
| Co(2)–N(2)      | 2.093(8)  | N(5)#1–Co(1)–N(3)#1 | 92.1(4) |
| Co(2)–N(2)#2    | 2.093(8)  | N(5)#1–Co(1)–N(3)   | 87.9(4) |
| Co(2)–N(6)      | 2.058(9)  | N(3)–Co(1)–N(7)     | 90.6(4) |
| Co(2)–N(6)#2    | 2.058(9)  | N(3)–Co(1)–N(7)#1   | 89.4(4) |
| Co(2)–N(8)      | 2.124(8)  | N(3)#1–Co(1)–N(7)   | 89.4(4) |
| Co(2)–N(8)#2    | 2.124(8)  | N(3)#1–Co(1)–N(7)#1 | 90.6(4) |
|                 |           |                     |         |
| Fe(1)–C(1)      | 1.919(13) | N(2)–Co(2)–N(8)#2   | 90.4(3) |
| Fe(1)–C(2)      | 1.886(10) | N(2)#2–Co(2)–N(8)   | 90.4(3) |
| Fe(1)–C(3)      | 1.884(10) | N(2)–Co(2)–N(8)     | 89.6(3) |
| Fe(1)–N(14)     | 1.958(8)  | N(2)#2–Co(2)–N(8)#2 | 89.6(3) |
| Fe(1)–N(16)     | 1.949(8)  | N(6)#2–Co(2)–N(2)   | 89.6(3) |
| Fe(1)–N(18)     | 1.974(8)  | N(6)#2–Co(2)–N(2)#2 | 90.4(3) |
| Fe(2)–C(4)      | 1.916(13) | N(6)–Co(2)–N(2)#2   | 89.6(3) |
| Fe(2)–C(5)      | 1.882(11) | N(6)–Co(2)–N(2)     | 90.4(3) |
| Fe(2)–C(6)      | 1.898(12) | N(6)–Co(2)–N(8)     | 89.7(4) |
| Fe(2)–N(22)     | 1.972(9)  | N(6)#2–Co(2)–N(8)#2 | 89.7(4) |
| Fe(2)–C(24)     | 1.972(8)  | N(6)#2–Co(2)–N(8)   | 90.3(4) |
| Fe(2)–N(26)     | 1.961(8)  | N(6)–Co(2)–N(8)#2   | 90.3(4) |

#1 1-X, 1-Y, 1-Z; #2 1-X, 2-Y, 1-Z

**Table S5.** Selected bond distances (Å) and angles (°) for **1·resolv** at 298 K.

| Bond length (Å) |          | Bond angle (°)      |         |
|-----------------|----------|---------------------|---------|
| Co(1)–N(3)      | 1.871(7) | N(5)#1–Co(1)–N(7)   | 89.7(2) |
| Co(1)–N(3)#2    | 1.872(7) | N(5)#3–Co(1)–N(7)#2 | 89.7(2) |
| Co(1)–N(5)#1    | 1.891(6) | N(5)#1–Co(1)–N(7)#2 | 90.3(2) |
| Co(1)–N(5)#3    | 1.891(6) | N(5)#3–Co(1)–N(7)   | 90.3(2) |
| Co(1)–N(7)      | 1.951(6) | N(3)–Co(1)–N(7)     | 91.1(3) |
| Co(1)–N(7)#2    | 1.951(6) | N(3)–Co(1)–N(7)#2   | 88.9(3) |
| Co(2)–N(2)      | 1.887(6) | N(3)#2–Co(1)–N(7)   | 88.9(3) |
| Co(2)–N(2)#1    | 1.887(6) | N(3)#2–Co(1)–N(7)#2 | 91.1(3) |
| Co(2)–N(6)      | 1.873(7) | N(3)–Co(1)–N(5)#1   | 88.7(3) |
| Co(2)–N(6)#1    | 1.874(7) | N(3)#2–Co(1)–N(5)#1 | 91.3(3) |
| Co(2)–N(8)      | 1.953(6) | N(3)#2–Co(1)–N(5)#3 | 88.7(3) |
| Co(2)–N(8)#1    | 1.953(6) | N(3)–Co(1)–N(5)#3   | 91.3(3) |
|                 |          |                     |         |
| Fe(1)–C(1)      | 1.914(9) | N(2)–Co(2)–N(8)     | 89.0(2) |
| Fe(1)–C(2)      | 1.860(7) | N(2)–Co(2)–N(8)#1   | 91.0(2) |
| Fe(1)–C(3)      | 1.854(8) | N(2)#1–Co(2)–N(8)#1 | 89.0(2) |
| Fe(1)–N(14)     | 1.997(6) | N(2)#1–Co(2)–N(8)   | 91.0(2) |
| Fe(1)–N(16)     | 1.981(6) | N(6)#1–Co(2)–N(8)   | 90.0(3) |
| Fe(1)–N(18)     | 2.013(6) | N(6)#1–Co(2)–N(8)#1 | 90.0(3) |
| Fe(2)–C(4)      | 1.932(9) | N(6)–Co(2)–N(8)     | 90.0(3) |
| Fe(2)–C(5)      | 1.907(8) | N(6)–Co(2)–N(8)#1   | 90.0(3) |
| Fe(2)–C(6)      | 1.895(9) | N(6)–Co(2)–N(2)     | 90.3(3) |
| Fe(2)–N(22)     | 1.969(6) | N(6)#1–Co(2)–N(2)#1 | 90.3(3) |
| Fe(2)–C(24)     | 1.950(6) | N(6)#1–Co(2)–N(2)   | 89.7(3) |
| Fe(2)–N(26)     | 1.970(6) | N(6)–Co(2)–N(2)#1   | 89.7(3) |

#1 1-X,1-Y,1-Z; #2 -X,1-Y,1-Z; #3 -1+X,+Y,+Z

**Table S6.** Selected bond distances (Å) and angles (°) for **1·solv** at 60 K.

| Bond length (Å) |          | Bond angle (°)      |         |
|-----------------|----------|---------------------|---------|
| Co(1)–N(3)      | 1.888(7) | N(3)–Co(1)–N(5)#1   | 89.7(3) |
| Co(1)–N(3)#1    | 1.888(7) | N(3)#1–Co(1)–N(5)#1 | 90.3(3) |
| Co(1)–N(5)      | 1.893(7) | N(3)#1–Co(1)–N(5)   | 89.7(3) |
| Co(1)–N(5)#1    | 1.893(7) | N(3)–Co(1)–N(5)     | 90.3(3) |
| Co(1)–N(7)      | 1.942(7) | N(3)–Co(1)–N(7)#1   | 90.0(3) |
| Co(1)–N(7)#1    | 1.942(7) | N(3)#1–Co(1)–N(7)   | 90.0(3) |
| Co(2)–N(2)      | 1.868(7) | N(3)#1–Co(1)–N(7)#1 | 90.0(3) |
| Co(2)–N(2)#2    | 1.868(7) | N(3)–Co(1)–N(7)     | 90.0(3) |
| Co(2)–N(6)#1    | 1.882(7) | N(5)#1–Co(1)–N(7)   | 90.3(3) |
| Co(2)–N(6)#3    | 1.882(7) | N(5)–Co(1)–N(7)     | 89.7(3) |
| Co(2)–N(8)      | 1.935(7) | N(5)#1–Co(1)–N(7)#1 | 89.7(3) |
| Co(2)–N(8)#2    | 1.935(7) | N(5)–Co(1)–N(7)#1   | 90.3(3) |
| Fe(1)–C(1)      | 1.912(9) | N(6)#3–Co(2)–N(8)   | 89.1(3) |
| Fe(1)–C(2)      | 1.866(9) | N(6)#1–Co(2)–N(8)#2 | 89.1(3) |
| Fe(1)–C(3)      | 1.860(8) | N(6)#3–Co(2)–N(8)#2 | 90.9(3) |
| Fe(1)–N(14)     | 1.999(6) | N(6)#1–Co(2)–N(8)   | 90.9(3) |
| Fe(1)–N(16)     | 2.018(7) | N(2)–Co(2)–N(6)#3   | 90.1(3) |
| Fe(1)–N(18)     | 1.993(6) | N(2)–Co(2)–N(6)#1   | 89.9(3) |
| Fe(2)–C(4)      | 1.931(1) | N(2)#2–Co(2)–N(6)#3 | 89.9(3) |
| Fe(2)–C(5)      | 1.921(9) | N(2)#2–Co(2)–N(6)#1 | 90.1(3) |
| Fe(2)–C(6)      | 1.917(9) | N(2)–Co(2)–N(8)     | 89.9(3) |
| Fe(2)–N(22)     | 1.982(6) | N(2)–Co(2)–N(8)#2   | 90.1(3) |
| Fe(2)–N(24)     | 1.945(7) | N(2)#2–Co(2)–N(8)   | 90.1(3) |
| Fe(2)–N(26)     | 1.973(7) | N(2)#2–Co(2)–N(8)#2 | 89.9(3) |

#1 1-X,1-Y,1-Z; #2 2-X,1-Y,1-Z; #3 1+X,+Y,+Z



**Table S7.** Selected bond distances (Å) and angles (°) for **1·solv** after 808 nm irradiation at 60 K.

| Bond length (Å) | 808 nm-irradiated | Bond angle (°)      | 808 nm-irradiated |
|-----------------|-------------------|---------------------|-------------------|
| Co(1)–N(3)      | 2.073(8)          | N(5)#1–Co(1)–N(7)#1 | 91.1(4)           |
| Co(1)–N(3)#1    | 2.073(9)          | N(5)–Co(1)–N(7)#1   | 88.9(4)           |
| Co(1)–N(5)      | 2.096(1)          | N(5)#1–Co(1)–N(7)   | 88.9(4)           |
| Co(1)–N(5)#1    | 2.096(1)          | N(5)–Co(1)–N(7)     | 91.1(4)           |
| Co(1)–N(7)      | 2.129(8)          | N(3)#1–Co(1)–N(5)#1 | 93.2(4)           |
| Co(1)–N(7)#1    | 2.129(8)          | N(3)–Co(1)–N(5)     | 93.2(4)           |
| Co(2)–N(2)      | 2.111(12)         | N(3)–Co(1)–N(5)#1   | 86.8(4)           |
| Co(2)–N(2)#2    | 2.111(12)         | N(3)#1–Co(1)–N(5)   | 86.8(4)           |
| Co(2)–N(6)      | 2.083(8)          | N(3)–Co(1)–N(7)#1   | 87.1(3)           |
| Co(2)–N(6)#2    | 2.083(8)          | N(3)#1–Co(1)–N(7)   | 87.1(3)           |
| Co(2)–N(8)      | 2.130(8)          | N(3)#1–Co(1)–N(7)#1 | 92.9(3)           |
| Co(2)–N(8)#2    | 2.130(8)          | N(3)–Co(1)–N(7)     | 92.9(3)           |
| Fe(1)–C(1)      | 1.921(11)         | N(2)–Co(2)–N(8)#2   | 90.1(3)           |
| Fe(1)–C(2)      | 1.921(14)         | N(2)#2–Co(2)–N(8)#2 | 89.9(3)           |
| Fe(1)–C(3)      | 1.911(1)          | N(2)–Co(2)–N(8)     | 89.9(3)           |
| Fe(1)–N(14)     | 1.976(8)          | N(2)#2–Co(2)–N(8)   | 90.1(3)           |
| Fe(1)–N(16)     | 1.964(11)         | N(6)#2–Co(2)–N(2)   | 88.4(3)           |
| Fe(1)–N(18)     | 1.998(8)          | N(6)–Co(2)–N(2)     | 91.6(3)           |
| Fe(2)–C(4)      | 1.940(10)         | N(6)#2–Co(2)–N(2)#2 | 91.6(3)           |
| Fe(2)–C(5)      | 1.883(12)         | N(6)–Co(2)–N(2)#2   | 88.4(3)           |
| Fe(2)–C(6)      | 1.907(1)          | N(6)#2–Co(2)–N(8)   | 89.7(3)           |
| Fe(2)–N(22)     | 1.966(8)          | N(6)–Co(2)–N(8)#2   | 89.7(3)           |
| Fe(2)–C(24)     | 1.972(7)          | N(6)#2–Co(2)–N(8)#2 | 90.3(3)           |
| Fe(2)–N(26)     | 1.960(1)          | N(6)–Co(2)–N(8)     | 90.3(3)           |

#1 2-X,1-Y,1-Z;#2 1-X,1-Y,1-Z

**Table S8.** Selected bond distances (Å) and angles (°) for **1·solv** after 532 nm irradiation at 60 K.

| Bond length (Å) | 532 nm-irradiated | Bond angle (°)      | 532 nm-irradiated |
|-----------------|-------------------|---------------------|-------------------|
| Co(1)–N(3)      | 1.887(6)          | N(5)–Co(1)–N(7)     | 90.0(3)           |
| Co(1)–N(3)#1    | 1.887(6)          | N(5)#1–Co(1)–N(7)   | 90.0(3)           |
| Co(1)–N(5)      | 1.894(7)          | N(5)#1–Co(1)–N(7)#1 | 90.0(3)           |
| Co(1)–N(5)#1    | 1.894(7)          | N(5)–Co(1)–N(7)#1   | 90.0(3)           |
| Co(1)–N(7)      | 1.944(6)          | N(3)–Co(1)–N(7)#1   | 90.3(2)           |
| Co(1)–N(7)#1    | 1.944(6)          | N(3)#1–Co(1)–N(7)   | 90.3(2)           |
| Co(2)–N(2)      | 1.881(7)          | N(3)#1–Co(1)–N(7)#1 | 89.7(2)           |
| Co(2)–N(2)#2    | 1.881(7)          | N(3)–Co(1)–N(7)     | 89.7(2)           |
| Co(2)–N(6)      | 1.885(6)          | N(3)#1–Co(1)–N(5)   | 90.5(3)           |
| Co(2)–N(6)#2    | 1.885(6)          | N(3)#1–Co(1)–N(5)#1 | 89.5(3)           |
| Co(2)–N(8)      | 1.932(6)          | N(3)–Co(1)–N(5)     | 89.5(3)           |
| Co(2)–N(8)#2    | 1.931(6)          | N(3)–Co(1)–N(5)#1   | 90.5(3)           |
| Fe(1)–C(1)      | 1.906(8)          | N(2)#2–Co(2)–N(8)#2 | 90.1(3)           |
| Fe(1)–C(2)      | 1.850(8)          | N(2)–Co(2)–N(8)     | 90.1(3)           |
| Fe(1)–C(3)      | 1.861(8)          | N(2)–Co(2)–N(8)#2   | 89.9(2)           |
| Fe(1)–N(14)     | 1.979(6)          | N(2)#2–Co(2)–N(8)   | 89.9(2)           |
| Fe(1)–N(16)     | 2.000(6)          | N(2)–Co(2)–N(6)     | 90.1(3)           |
| Fe(1)–N(18)     | 2.015(6)          | N(2)–Co(2)–N(6)#2   | 89.9(3)           |
| Fe(2)–C(4)      | 1.920(8)          | N(2)#2–Co(2)–N(6)#2 | 90.1(3)           |
| Fe(2)–C(5)      | 1.908(8)          | N(2)#2–Co(2)–N(6)   | 89.9(3)           |
| Fe(2)–C(6)#2    | 1.918(8)          | N(6)–Co(2)–N(8)     | 88.8(2)           |
| Fe(2)–N(22)     | 1.937(7)          | N(6)–Co(2)–N(8)#2   | 91.2(2)           |
| Fe(2)–C(24)     | 1.975(6)          | N(6)#2–Co(2)–N(8)   | 91.2(2)           |
| Fe(2)–N(26)     | 1.970(6)          | N(6)#2–Co(2)–N(8)#2 | 88.8(2)           |

#1 1-X,1-Y,1-Z; #2 2-X,1-Y,1-Z

**Table S9.** Continuous Shape Measure (CShM) analyses of geometries for compounds **1·solv** and **1·desolv** at 298 K by SHAPE 2.0 Software.

| Geometry                                          | <b>1·solv</b> |        |        |        | <b>1·desolv</b> |        |        |        |
|---------------------------------------------------|---------------|--------|--------|--------|-----------------|--------|--------|--------|
|                                                   | Co1           | Co2    | Fe1    | Fe2    | Co1             | Co2    | Fe1    | Fe2    |
| Hexagon/ $D_{6h}$                                 | 32.557        | 32.849 | 32.157 | 32.340 | 31.985          | 32.890 | 32.438 | 32.169 |
| Pentagonal<br>pyramid/ $C_{5v}$                   | 29.914        | 30.041 | 29.211 | 29.347 | 29.624          | 29.986 | 29.418 | 29.017 |
| Octahedron/ $O_h$                                 | 0.039         | 0.023  | 0.074  | 0.153  | 0.059           | 0.019  | 0.090  | 0.131  |
| Trigonal prism/ $D_{3h}$                          | 16.507        | 16.639 | 15.599 | 15.647 | 16.223          | 16.678 | 16.136 | 15.714 |
| Johnson pentagonal<br>pyramid ( $J_2$ )/ $C_{5v}$ | 33.351        | 33.500 | 32.784 | 32.950 | 33.000          | 33.400 | 33.014 | 32.633 |

CShM: the continuous shape measurement relative to the ideal octahedron of the M centers, zero value means the ideal octahedron geometries.

**Table S10.** Hydrogen bond distances (Å) and angles (°) for **1·solv** at 298 K.

| D–H⋯A     | d(D–H)/ Å | d(H⋯A)/ Å | d(D–H⋯A)/ Å | D–H⋯A/ ° |
|-----------|-----------|-----------|-------------|----------|
| O1–H1A⋯N1 | 0.85      | 2.15      | 2.951(12)   | 156      |
| O2–H18⋯N4 | 0.82      | 2.00      | 2.809(8)    | 172      |

**Table S11.**  $^{57}\text{Fe}$  Mössbauer parameters for **1·solv** at 200 K.

| $T$ (K) | $\delta$ (mm s $^{-1}$ ) | $\Delta E_Q$ (mm s $^{-1}$ ) | Relative area (%) | Approximation ratio | Fe type                        |
|---------|--------------------------|------------------------------|-------------------|---------------------|--------------------------------|
| 200K    | 0.23                     | 0.65                         | 50.96             | 1                   | Fe $^{\text{II}}_{\text{LS}}$  |
|         | -0.07                    | 0.94                         | 49.04             | 1                   | Fe $^{\text{III}}_{\text{LS}}$ |

**Table S12.** Temperature-dependent  $^{57}\text{Fe}$  Mössbauer parameters for **1·desolv**.

| $T$ (K) | $\delta$ (mm s $^{-1}$ ) | $\Delta E_Q$ (mm s $^{-1}$ ) | Relative area (%) | Approximation ratio | Fe type                        |
|---------|--------------------------|------------------------------|-------------------|---------------------|--------------------------------|
| 298K    | -0.10                    | 1.04                         | 100               | ---                 | Fe $^{\text{III}}_{\text{LS}}$ |
| 80K     | 0.14                     | 0.54                         | 32.73             | 1                   | Fe $^{\text{II}}_{\text{LS}}$  |
|         | -0.01                    | 1.41                         | 67.27             | 1                   | Fe $^{\text{III}}_{\text{LS}}$ |

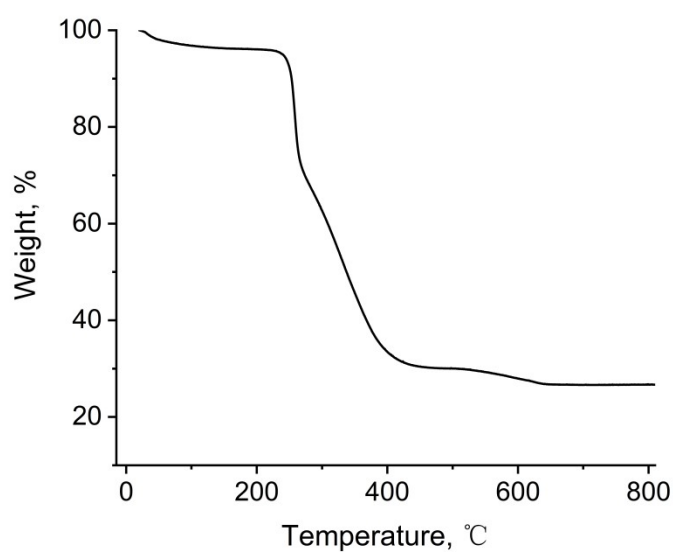

**Fig. S1.** TGA analyses of **1·solv** in the nitrogen atmosphere at  $10 \text{ K min}^{-1}$ . The first weight loss below  $230 \text{ }^\circ\text{C}$  (experimental: 5.31% for **1·solv**) should be ascribed to the loss of isolated solvent molecules (expected: 5.48% for **1·solv**).

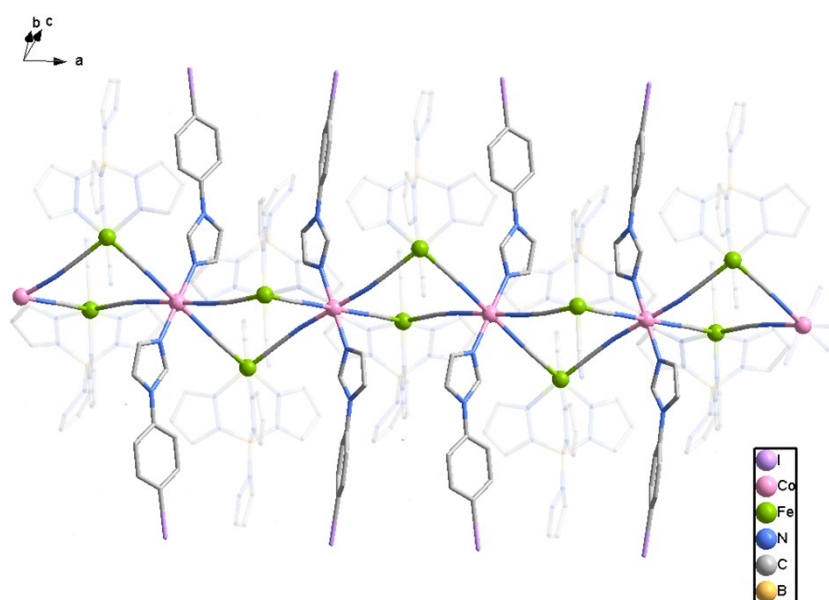

**Fig. S2.** Schematic structures of the  $\{\text{Fe}_2\text{Co}\}$ -based double zig-zag chains in **1·desolv** at 298 K. H atoms have been omitted for clarity. Color code: Co, pink; Fe, green; B, yellow; C, grey; N, blue; I, purple.

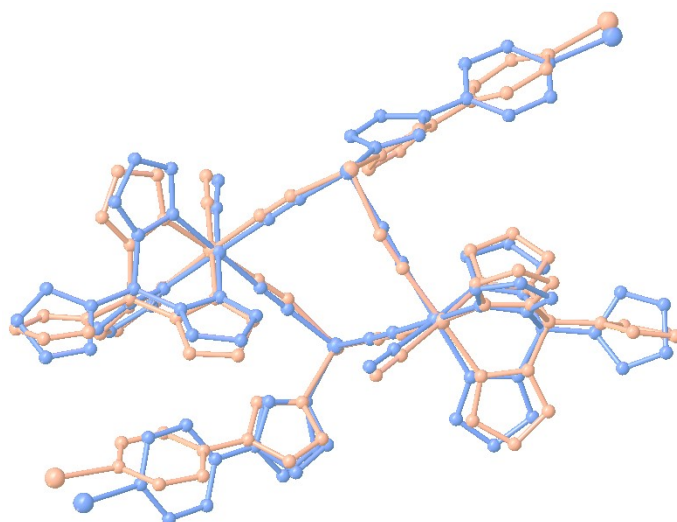

**Fig S3.** The overlapped molecular structures of **1·solv** (pale blue) and **1·desolv** (pale orange) at 298 K. Hydrogen atoms and solvents are omitted for clarity.

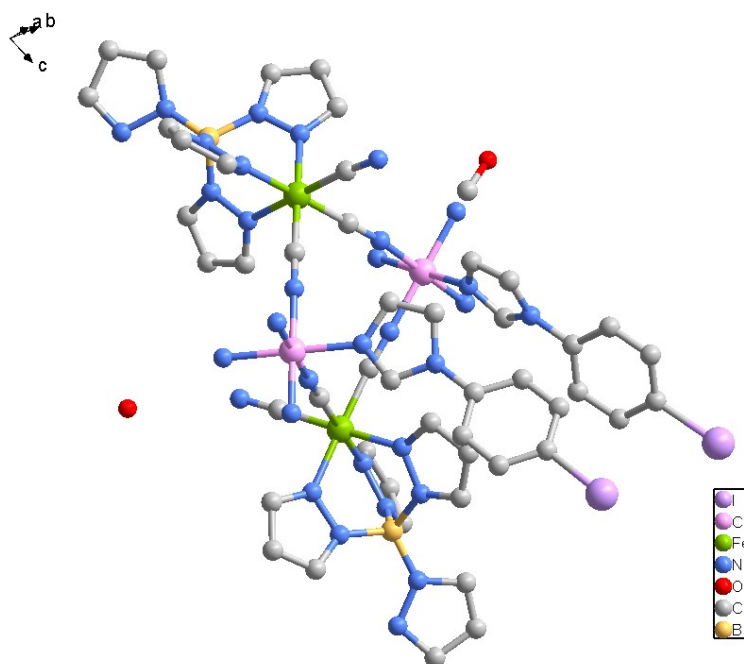

**Fig. S4.** Crystal structure of **1·resolv** at 298 K. H atoms have been omitted for clarity. Color code: Co, pink; Fe, green; B, yellow; C, grey; N, blue; O, red; I, purple.

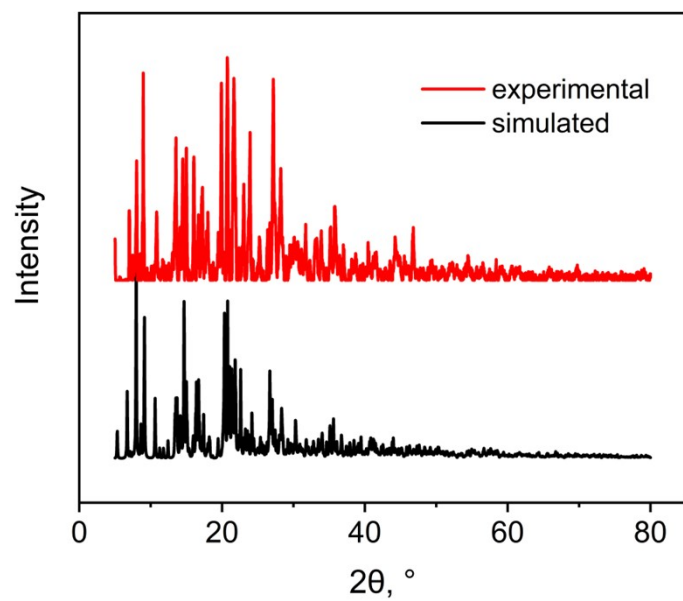

**Fig. S5.** The simulated and experimental powder X-ray diffraction patterns of  $1 \cdot \text{solv}$  at 298 K.

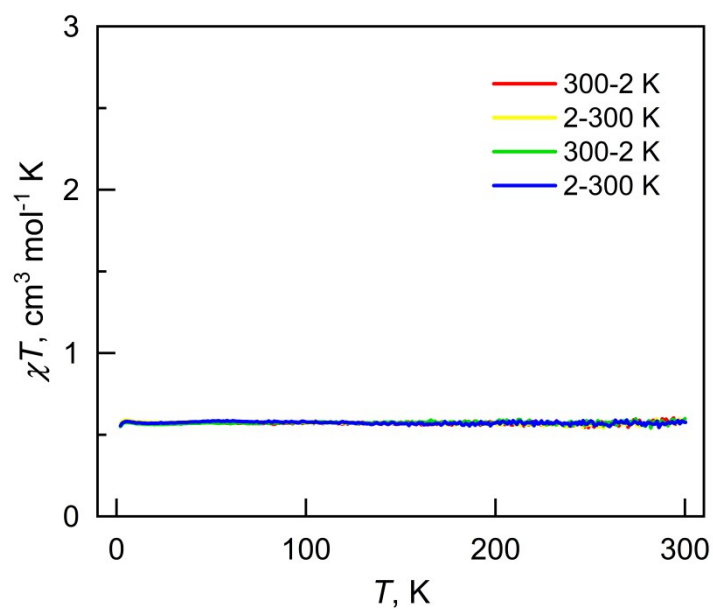

**Fig. S6.** Plots of  $\chi T$  vs  $T$  for  $1 \cdot \text{solv}$  between 2 and 300 K.

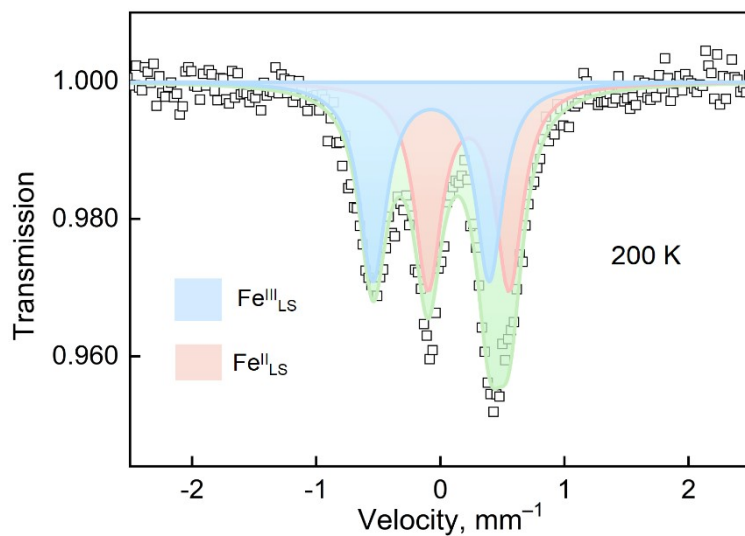

**Fig. S7** Temperature dependent  $^{57}\text{Fe}$  Mössbauer spectra of **1·solv** at 200 K. All spectra were fitted to Lorentzian profiles by the least-squares method, and the fit quality was controlled by the standard  $\chi^2$  and misfit tests (MossWinn program).

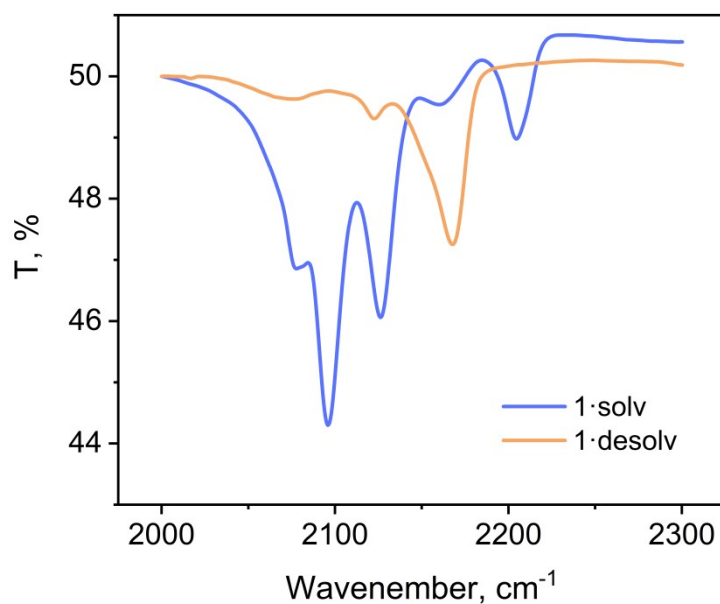

**Fig. S8.** Infrared spectra for compounds **1·solv** and **1·desolv** at 298 K



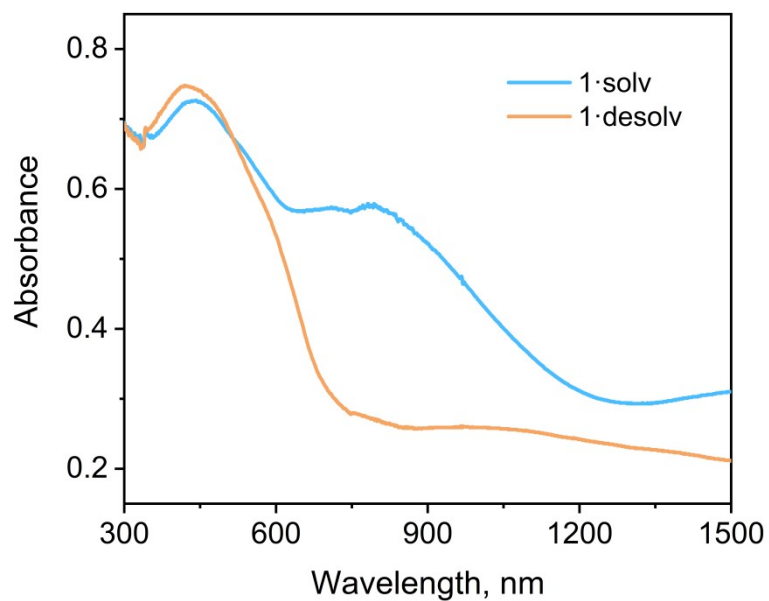

**Fig. S9.** Solid state UV-vis-NIR spectra for **1·solv** and **1·desolv** at 298 K.

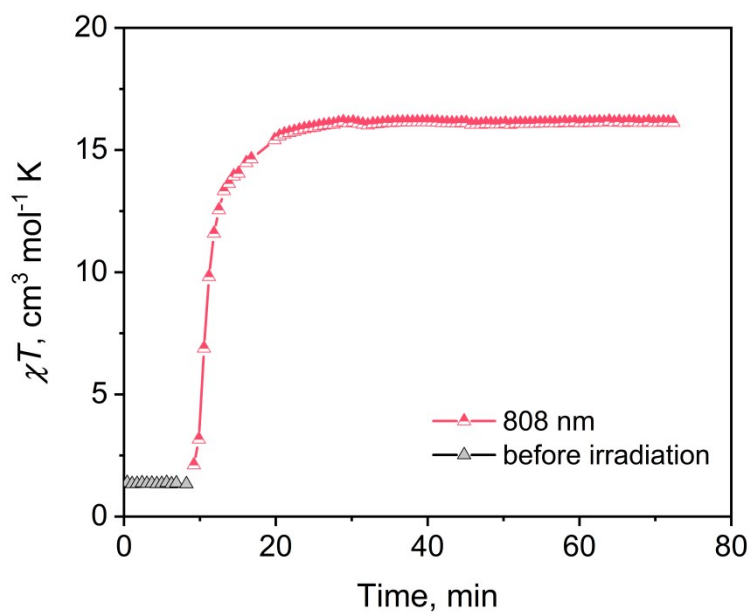

**Fig. S10.** Plots of  $\chi T$  vs time for **1·solv** irradiated under 808 nm at 10 K.

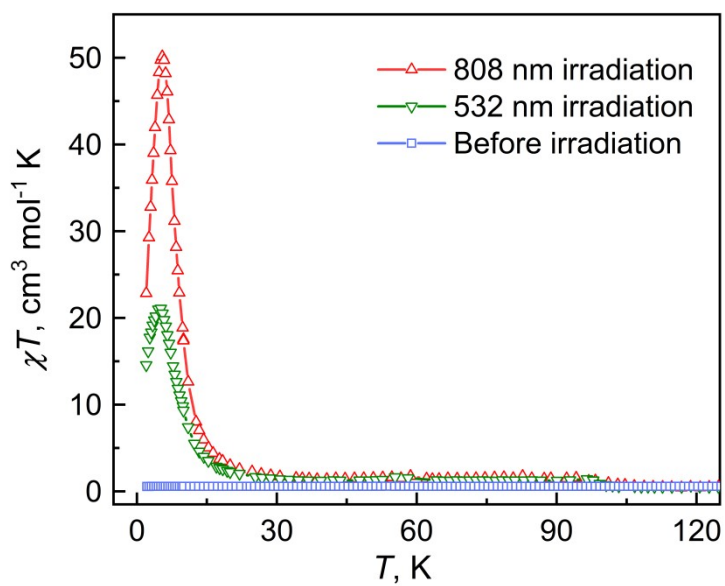

**Fig. S11.** Temperature-dependent susceptibilities of **1·solv** before and after light irradiation under an 1000 Oe DC field.

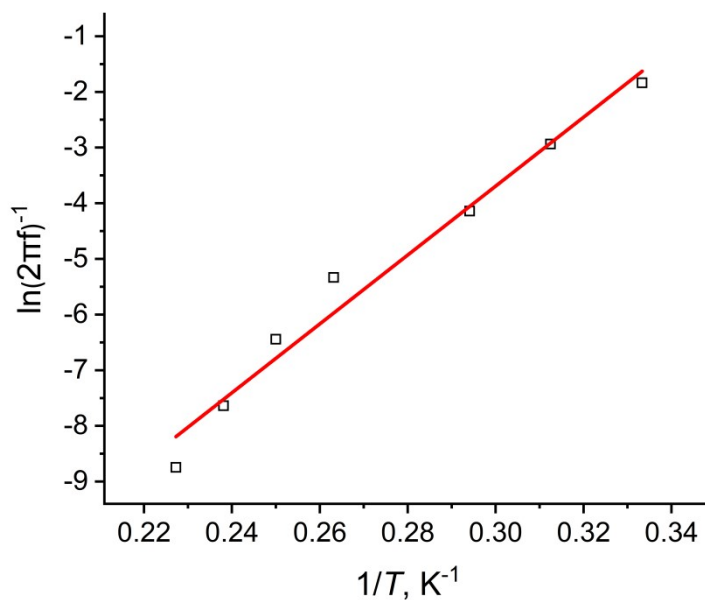

**Fig. S12.** Arrhenius plots for the magnetic relaxation process of **1·solv** after 808 nm light irradiation based on the peak values of  $\chi''$ .

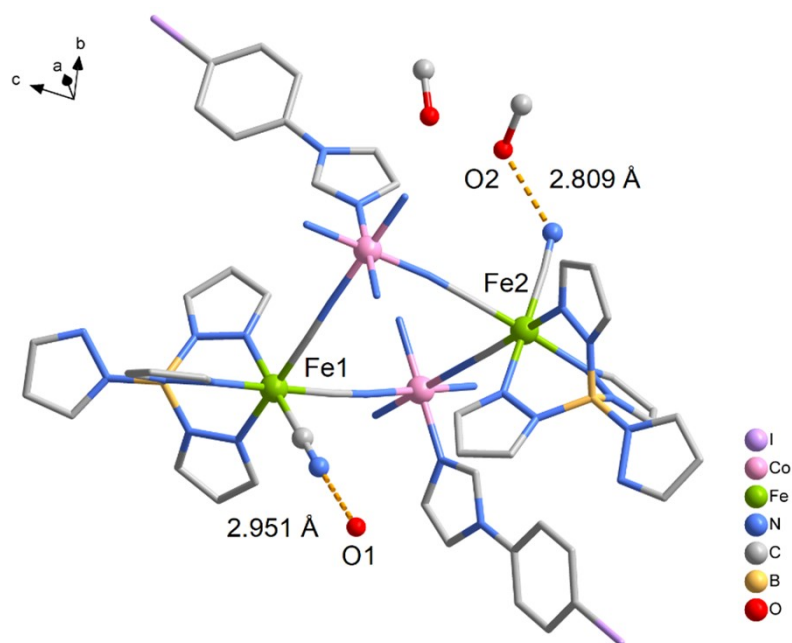

**Fig. S13.** Hydrogen bonds formed between lattice solvent molecules and terminal cyanide nitrogen atoms for **1·solv**. H atoms have been omitted for clarity. Color code: Co, pink; Fe, green; B, yellow; C, grey; N, blue; O, red; I, purple.

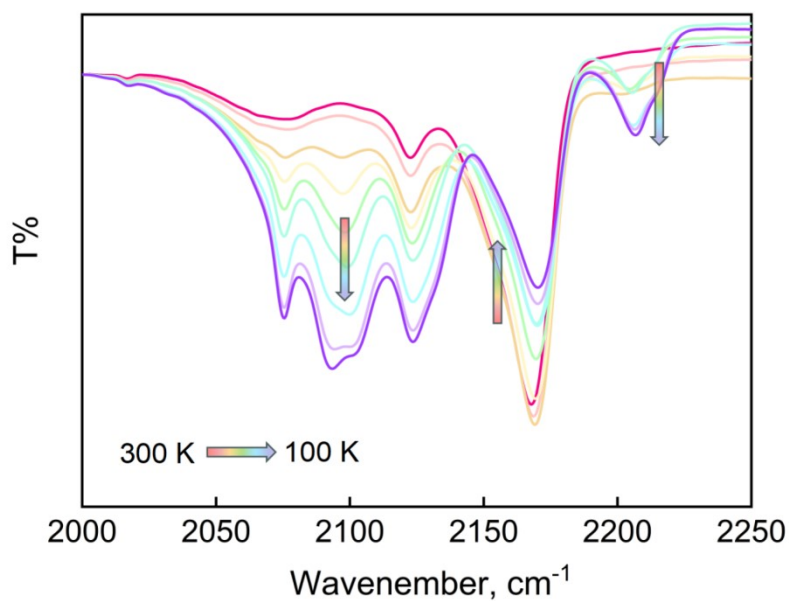

**Fig. S14.** Variable temperature solid state IR spectra of **1·desolv** in cooling mode.

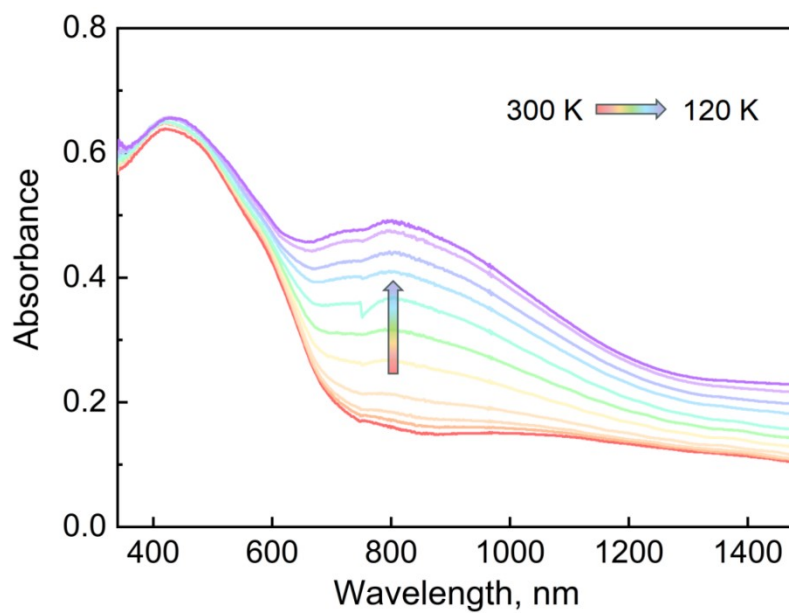

**Fig. S15.** Variable temperature solid state UV-vis-NIR absorption spectra of **1·desolv** in cooling mode.

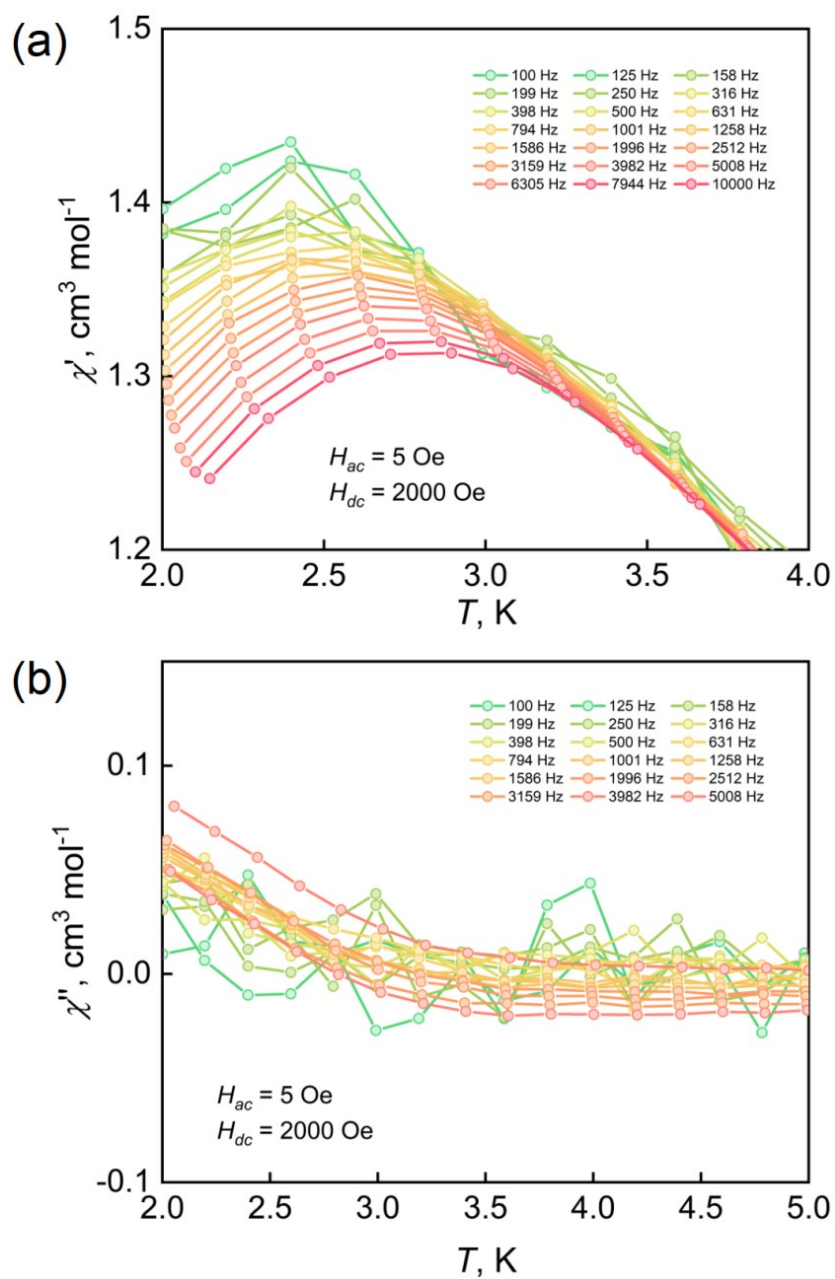

**Fig. S16.** Temperature dependence of in-phase signals ( $\chi'$ ) (a) and out-of-phase signals ( $\chi''$ ) (b) for **1•desolv** under a 5 Oe AC field and 2000 Oe DC field.

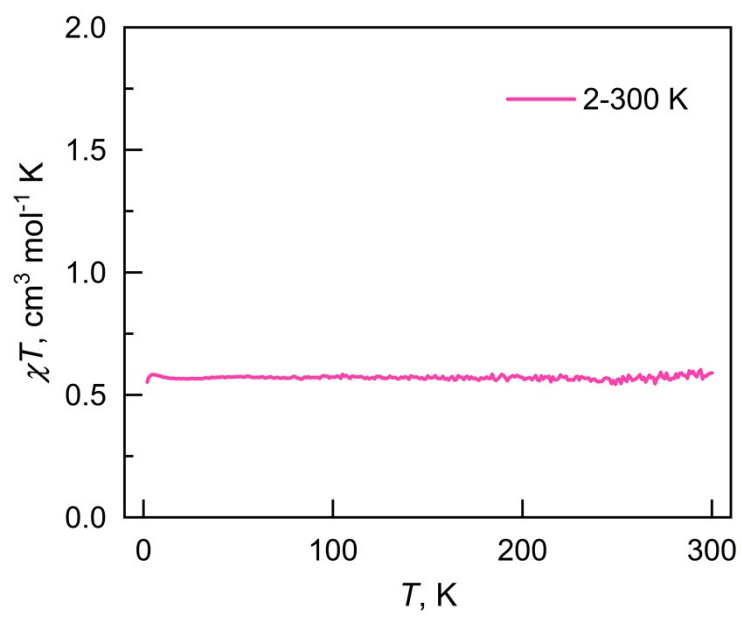

**Fig. S17.** Plots of  $\chi T$  vs.  $T$  for **1·resolv.**
